# Supplementary material
Source: PubMed Central journal article supplement (PMC3651436)
Supplement: 1222334110_pnas.201222334SI.pdf [file 1222334110_pnas.201222334SI.pdf]

# Supporting Information

Fozzatti et al. 10.1073/pnas.1222334110

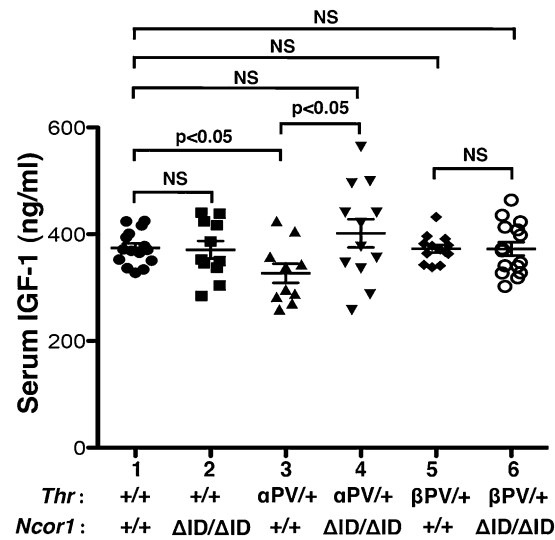

**Fig. S1.** Serum insulin-like growth factor 1 (IGF1) concentrations in *Thra*<sup>PV/+</sup> and *Thrb*<sup>PV/+</sup> mice with or without NCOR1ΔID. Serum IGF1 concentrations were determined by using an IGF1 Mouse ELISA Kit (22-IG1MS-E01, Alpco) according to the manufacturer's instructions. The genotype of mice are marked: *Thra*<sup>+/+</sup>*Ncor1*<sup>+/+</sup> (*n* = 15), *Thra*<sup>+/+</sup>*Ncor1*<sup>ΔID/ΔID</sup> (*n* = 11), *Thra*<sup>αPV/+</sup>*Ncor1*<sup>+/+</sup> (*n* = 10), *Thra*<sup>αPV/+</sup>*Ncor1*<sup>ΔID/ΔID</sup> (*n* = 12), *Thrb*<sup>PV/+</sup>*Ncor1*<sup>+/+</sup> (*n* = 13), and *Thrb*<sup>PV/+</sup>*Ncor1*<sup>ΔID/ΔID</sup> mice (*n* = 15). Data are expressed as mean values ± SEM with *P* values shown.

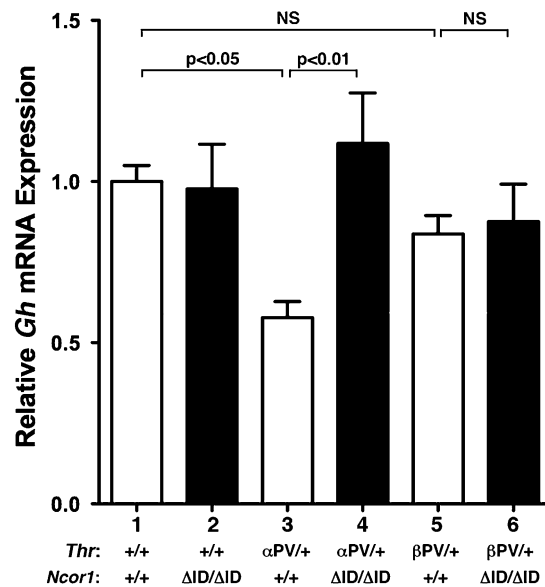

**Fig. S2.** Comparison of the mRNA expression of the growth hormone gene (*Gh*) in the pituitary of *Thra*<sup>PV/+</sup> and *Thrb*<sup>PV/+</sup> mice with or without NCOR1ΔID. The mRNA expression was determined by real-time RT/PCR as described in *Materials and Methods*. The primer sequences of mouse *Gh* for real-time PCR were as follows: Forward, TTCGAGCGTGCTACATT; Reverse, GCATGTTGGCGTCAACTTG. The data are expressed as mean ± SEM (*n* = 9) and *P* values are indicated.
